# Supplementary material
Source: MDPI journal article supplement (https://www.mdpi.com/2075-5309/13/9/2339)

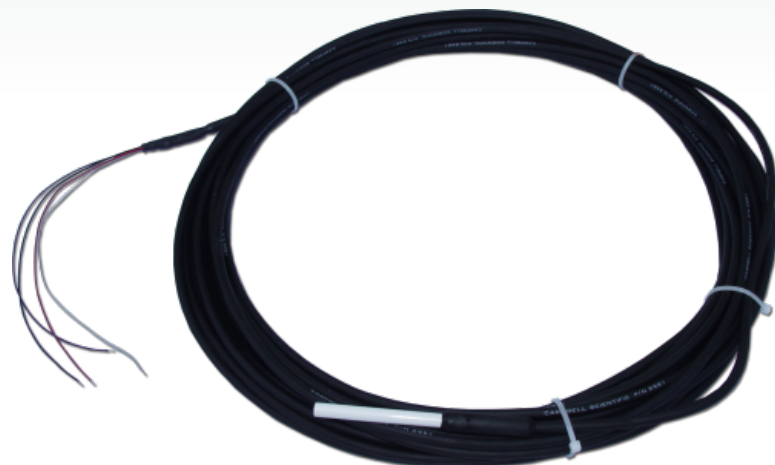

## Rugged, Accurate, Versatile

Can be used in a variety of applications

### Overview

The 107 is a rugged, accurate probe that measures temperature of air, soil, or water from -35° to +50°C. It easily interfaces with most Campbell Scientific data loggers and can be used in a variety of applications.

The 107 consists of a thermistor encapsulated in an epoxy-filled aluminum housing. The housing protects the thermistor, allowing you to bury the probe in soil or submerge it in water.

### Benefits and Features

- › Versatile product—measures air, soil, or water temperature
- › Easy to install or remove
- › Durable
- › Compatible with AM16/32-series multiplexers, allowing measurement of multiple sensors

### Specifications

|                                |                                                                     |
|--------------------------------|---------------------------------------------------------------------|
| Sensor Description             | BetaTherm 100K6A11A Thermistor                                      |
| Tolerance                      | ±0.2°C (over 0° to 50°C range)                                      |
| Temperature Measurement Range  | -35° to +50°C                                                       |
| Temperature Survival Range     | -50° to +100°C                                                      |
| Steinhart-Hart Equation Error  | ≤±0.01°C over measurement range (CRBasic data loggers only)         |
| Polynomial Linearization Error | Typically < ±0.5°C over measurement range (Edlog data loggers only) |
| Time Constant in Air           | 30 to 60 s (in a wind speed of 5 m s <sup>-1</sup> )                |

|                      |                                                                                                                                                                               |
|----------------------|-------------------------------------------------------------------------------------------------------------------------------------------------------------------------------|
| Maximum Submergence  | 15 m (50 ft)                                                                                                                                                                  |
| Probe Diameter       | 0.76 cm (0.3 in.)                                                                                                                                                             |
| Probe Length         | 10.4 cm (4.1 in.)                                                                                                                                                             |
| Maximum Cable Length | › 305 m (1000 ft) is typical and requires no programming changes.<br>› 762 m (2500 ft) requires programming changes. (Refer to section 8.4 of the 107 manual for assistance.) |
| Weight               | 136 g (5 oz) with (3.05 m) 10 ft cable                                                                                                                                        |

For comprehensive details, visit: [www.campbellsci.com/107](http://www.campbellsci.com/107) 

Supplement: s1 [file s1]
