# Supplementary material
Source: MDPI journal article supplement (https://www.mdpi.com/2075-5309/13/9/2339)
Supplement: s1 [file s1]

# RA01

## 2-component radiometer

RA01 is a market leading 2-component radiometer, mostly used in scientific-grade energy balance and surface flux studies. It offers 2 separate measurements of solar and longwave radiation. Product features include a modular design, low weight, and easy levelling, and low solar offsets in the longwave measurement. The unique capability to heat the pyrgeometer reduces measurement errors caused by dew deposition. When combined with estimates of solar albedo and of local surface temperature, this instrument can also be used for estimation of net radiation. The advantages of this approach are cost reduction and independence from local surface properties.

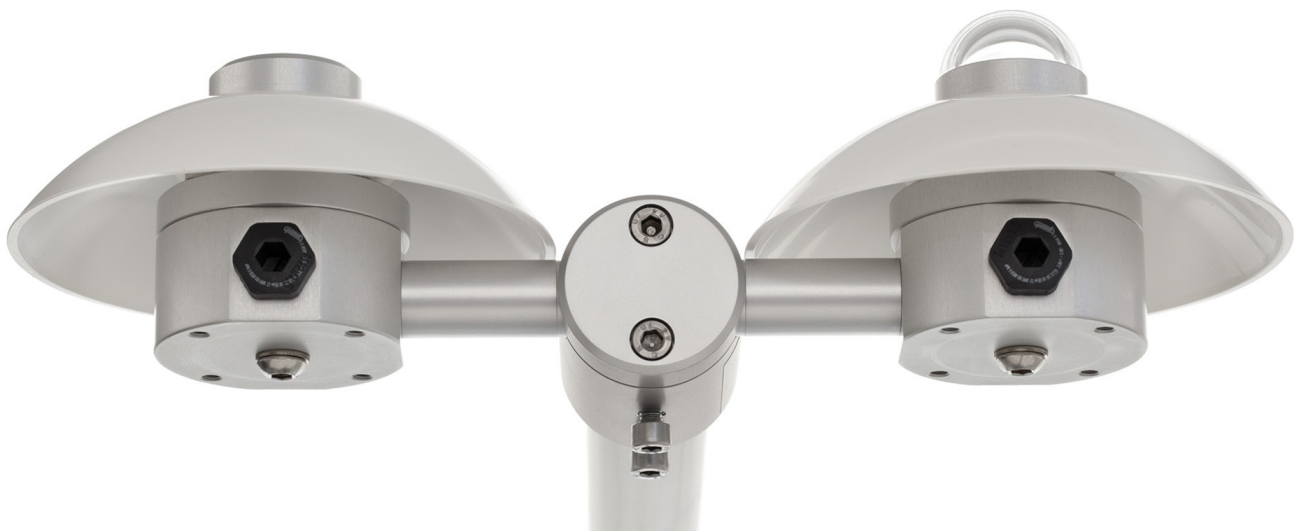

**Figure 1** RA01 2-component radiometer

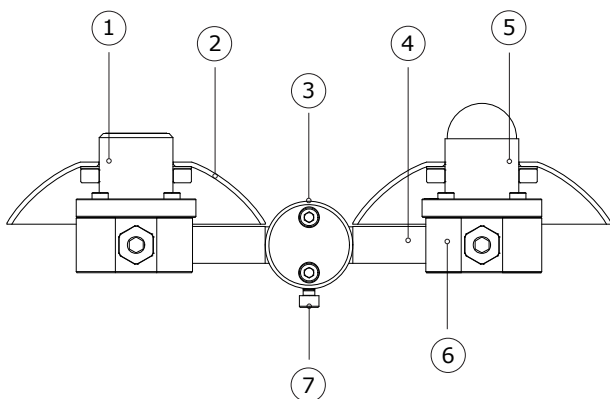

**Figure 2** overview of RA01:

(1) upward facing pyrgeometer, (2) sun screens, (3,4,7) levelling assembly for x- and y-axis, (5) upward facing pyranometer, (6) instrument body

### Introduction

RA01 measures the 2 incoming components of the surface radiation balance: global solar and downward longwave radiation. The solar radiation sensor is called pyranometer, the longwave sensor is called pyrgeometer. For calculation of sky temperature, it is necessary to compensate for irradiated heat by the pyrgeometer (Stefan-Boltzmann law). A Pt100 temperature sensor is included in RA01's body for that purpose. Sunshine duration may be estimated according to the WMO approved pyranometric method.

### Operation

Using RA01 radiometer is easy. It can be connected directly to commonly used data logging systems. The irradiance levels in  $W/m^2$  are calculated by dividing the RA01 outputs, small voltages, by the sensitivities. The longwave irradiance should be corrected using the instrument body temperature. The sensitivities of all sensors are provided with RA01 on its product certificate.

## RA01 design

RA01 radiometer has a modular design: it is possible to take the instrument apart and replace or re-calibrate individual sensors. A 2-axis levelling assembly is included. The levelling assembly fits a 1 inch NPS tube (the tube's recommended outer diameter equals  $33.4 \times 10^{-3}$  m). With the RA01 shim, included in RA01's delivery, a  $\frac{3}{4}$  inch NPS tube may also be used.

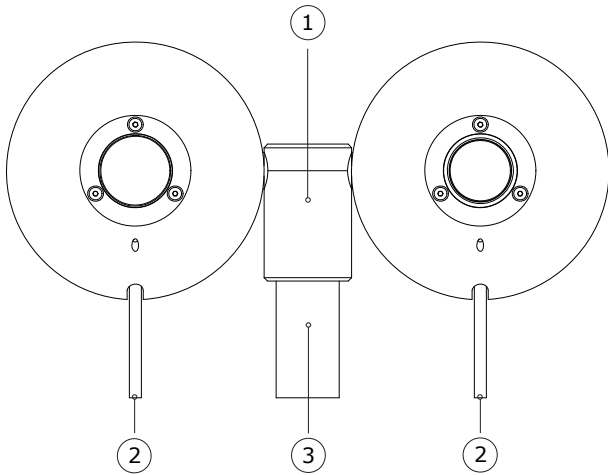

**Figure 3** top view of RA01:  
(1) levelling assembly for x- and y-axis, (2) cables,  
(3) mounting tube (not included)

## Suggested use

- energy balance studies
- surface flux measurements
- climatological networks

## Standards

Applicable instrument-classification standards are ISO 9060 and WMO-No.-8; Guide to Meteorological Instruments and Methods of Observation.

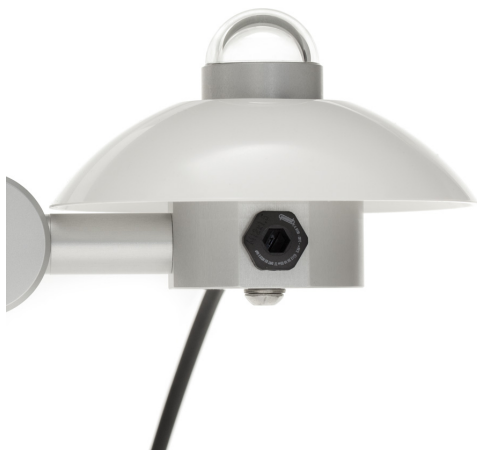

**Figure 4** RA01 2-component radiometer in detail:  
pyranometer model SR01

## RA01 specifications

|                                   |                                                                                                                                        |
|-----------------------------------|----------------------------------------------------------------------------------------------------------------------------------------|
| Measurand                         | global solar radiation                                                                                                                 |
| Measurand                         | downward longwave radiation*                                                                                                           |
| Optional measurand                | sky temperature*                                                                                                                       |
| Optional measurand                | sunshine duration                                                                                                                      |
| Included sensors                  | 1 x ISO 9060 second class pyranometer<br>1 x pyrgeometer with 150 ° field of view angle                                                |
| Leveling                          | 2-axis levelling assembly included                                                                                                     |
| Mounting                          | on a 1 inch NPS tube;<br>RA01 delivery includes a shim for easy alternative mounting on a $\frac{3}{4}$ inch tube (tubes not included) |
| Temperature sensor                | Pt100                                                                                                                                  |
| Measurand Pt100                   | instrument body temperature                                                                                                            |
| Required readout                  | 2 x DC voltage, 1 x Pt100                                                                                                              |
| Calibration traceability solar    | to WRR                                                                                                                                 |
| Spectral range solar              | 285 to $3000 \times 10^{-9}$ m                                                                                                         |
| Calibration traceability longwave | to WISG                                                                                                                                |
| Spectral range longwave           | $4.5$ to $42 \times 10^{-6}$ m                                                                                                         |
| Rated operating temperature range | -40 to +80 °C                                                                                                                          |
| Heater on pyrgeometer             | 12 VDC, 1.5 W                                                                                                                          |
| Standard cable length             | 2 x 5 m (see options)                                                                                                                  |
| * Required measurand              | instrument body                                                                                                                        |

## Options

- longer cable, in multiples of 5 m, cable lengths above 20 m in multiples of 10 m
- 10 kΩ thermistor instead of Pt100 temp. sensor

## See also

- [NR01](#) 4-component net radiometer, the most popular instrument to measure net radiation and the 4 separate components of the surface radiation balance
- [CMF01 mounting fixture](#) for mounting RA01 on a mast
- view our complete [product range of radiometers](#)

## About Hukseflux

Hukseflux Thermal Sensors makes sensors and measuring systems. Hukseflux products and services are offered worldwide via our office in Delft, the Netherlands and local distributors.

Interested in this product?  
E-mail us at: [info@hukseflux.com](mailto:info@hukseflux.com)
