# Supplementary material
Source: MDPI journal article supplement (https://www.mdpi.com/2075-5309/13/9/2339)
Supplement: s1 [file s1]

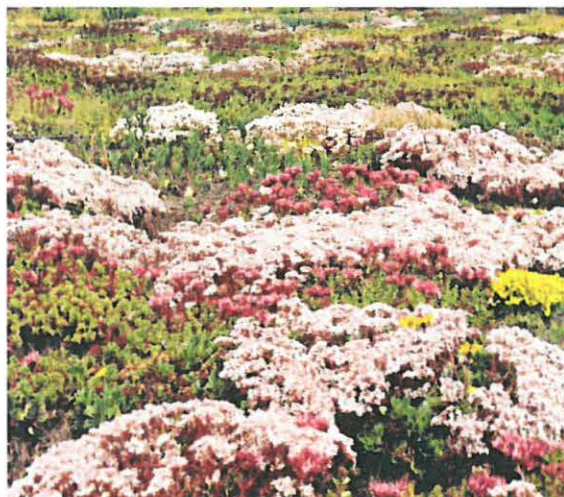

## Beschreibung

Bei dem **GDT Typ Sedumteppich** handelt es sich um eine **Sedum-Begrünung**, die sich aus verschiedenen trockenresistenten, niedrigwachsenden Mauerpfeffer-Arten zusammensetzt und einen dauerhaften, dichten Pflanzenteppich bildet. Die Bepflanzung ist pflegeleicht und selbsterhaltend. Die Einbringung ist bei Frostfreiheit jederzeit möglich.

Die Pflanzen können als **Sprossenaussaat**, **Anspritzbegrünung**, **Flachballenpflanzen** und/oder **Vegetationsmatte** aufgebracht werden.

## Pflanzenliste

Der **GDT Typ Sedumteppich** besteht aus mind. 6 Arten/Sorten der folgenden Liste:

| Botanischer Name       | Deutscher Name        | Höhe (cm) | Blütenfarbe | Blütezeit |
|------------------------|-----------------------|-----------|-------------|-----------|
| <b>Sedum-Arten</b>     |                       |           |             |           |
| Sedum acre             | Scharfer Mauerpfeffer | 5-10      | gelb        | 5-7       |
| Sedum album            |                       |           |             |           |
| „Coral Carpet“         | Rotmoos-Sedum         | 5-10      | weiß        | 6-8       |
| Sedum album            |                       |           |             |           |
| „Micranthum“           | Gelber Mauerpfeffer   | 5-10      | weiß        | 6-7       |
| Sedum ewersii          | Himalaja-Sedum        | 10-15     | rosa        | 8-9       |
| Sedum floriferum       |                       |           |             |           |
| „Weihenstephaner Gold“ | Fetthenne             | 10-15     | goldgelb    | 7-8       |
| Sedum hybridum         |                       |           |             |           |
| „Immergrünchen“        | Mongolen-Sedum        | 10-15     | gelb        | 7-8       |
| Sedum kamtschaticum    | Kamtschatka-Sedum     | 10-15     | gelb        | 6-7       |
| Sedum lydium           |                       |           |             |           |
| „Glaucum“              |                       | 3-5       | weiß        | 6-7       |
| Sedum reflexum         | Tripmadam             | 10-15     | gelb        | 6-7       |
| Sedum sexangulare      | Milder Mauerpfeffer   | 5-10      | gelb        | 6-7       |
| Sedum spurium          |                       |           |             |           |
| „Fuldaglut“            | Teppich-Sedum         | 10-15     | rot         | 7-8       |
| Sedum spurium          |                       |           |             |           |
| „Album Superbum“       | Schneeteppich-Sedum   | 15-20     | weiß        | 7-8       |
| Sedum telephium        | Purpurrotes Sedum     | 40        | rot         | 7-9       |

Die aufgeführten Arten stellen einen Auszug aus der Pflanzenliste dar. Außerdem kann die Vegetationszusammensetzung nicht eindeutig vorhergesagt werden, da diese vom Standort des Daches, Exposition der Dachfläche, Schattenwurf auf das Dach, Substrateinbaustärke, dem Systemaufbau und anderen Faktoren abhängt.

Stand: Januar 2002
