# Supplementary material
Source: MDPI journal article supplement (https://www.mdpi.com/2075-5309/13/9/2339)
Supplement: s1 [file s1]

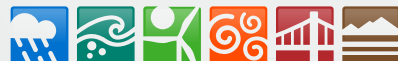

# ANTENNA 3 dBi MIMO

Antenna 3 dBi MIMO Wall/pole mount c/w 3m Cable & SMA Connector for 3G/4G

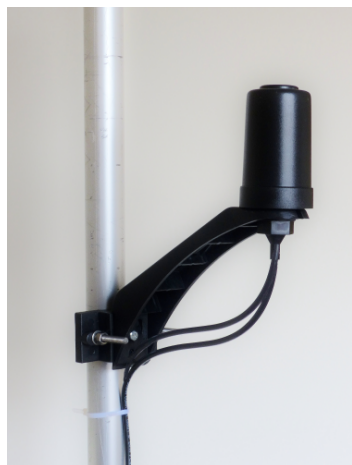

Weather and corrosion proof

## Overview

A weather and corrosion proof base station antenna supplied with a wall/pole bracket. Covers the 2G, 3G and 4G frequency bands. Can be mounted to a flat surface using

user supplied screws or to a vertical pole 26-50 mm in diameter using the pole mount adaptor (included).

## Benefits and Features

- › Weather and corrosion proof
- › Covers the 2G, 3G & 4G frequency bands
- › Recommended for some of Campbell Scientific's higher speed cellular modems
- › Higher data transfer speeds

## Technical Description

Internally the antenna incorporates two identical elements in a MIMO configuration with two separate output leads. The MIMO configuration is recommended for some of Campbell Scientific's higher speed cellular modems, the RV50X, for instance. The configuration can give slightly higher data transfer speeds with faster, ethernet connected dataloggers.

011031 ANTENNA 3 dBi MIMO ENCLOSURE MOUNT C/W 400mm CABLE & SMA CONNECTOR for 3G/4G

To gain benefit from the MIMO configuration ensure the modem is configured to use a second antenna.

**Notes:**

This antenna is also available as an enclosure mount version for fitting in the top of the enclosure with 400 mm leads. The part number is:

If an antenna is required to provide spatial diversity, as is sometimes recommended for problematic sites on 3G networks, please buy two non-MIMO antennas and mount them separated by a distance of at least 0.5 metres.

**NOTE:** These antennae are only sold in the European market.

## Specifications

| General  |                 |
|----------|-----------------|
| Polarity | Omnidirectional |

|      |         |
|------|---------|
| Gain | 3 dBi   |
| VSWR | 1.7 : 1 |

|            |                               |
|------------|-------------------------------|
| Dimensions | Height: 83 mm Diameter: 53 mm |
| Cable      | 3 metres of RG58 x2           |
| Connector  | SMA x2                        |
| Power      | 20 watts                      |
| Impedance  | 50 ohms                       |

|                             |                                        |
|-----------------------------|----------------------------------------|
| Operating Temperature Range | -30°C to +50°C                         |
| Bracket                     | 170 mm Standoff bracket                |
| Waterproof                  | IP65                                   |
| Material                    | Black, UV stable, engineering plastics |

For comprehensive details, visit: [www.campbellsci.eu/antenna-3-dbi-mimo](http://www.campbellsci.eu/antenna-3-dbi-mimo) 

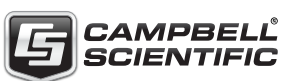

80 Hathern Road, Shepshed, LE12 9GX UK | +(0)1509 828888 | [sale@campbellsci.co.uk](mailto:sale@campbellsci.co.uk) | [www.campbellsci.eu](http://www.campbellsci.eu)  
 AUSTRALIA | BRAZIL | CANADA | CHINA | COSTA RICA | FRANCE | GERMANY | INDIA | SOUTH AFRICA | SPAIN | THAILAND | UK | USA
