# Supplementary material
Source: MDPI journal article supplement (https://www.mdpi.com/2075-5309/13/9/2339)
Supplement: s1 [file s1]

## Bauder Pflanzsubstrat BL

### Produktdatenblatt

|                     |                                                                                                                              |
|---------------------|------------------------------------------------------------------------------------------------------------------------------|
| Produktbeschreibung | <b>Mineralisches Schüttstoffgemisch, Hauptbestandteile Blähschiefer und Lava, mit geringen Anteilen organischer Substanz</b> |
| Einsatzbereich      | <b>Vegetationssubstrat für einschichtige Extensivbegrünungen</b>                                                             |

| Eigenschaft nach FLL           | Anforderung         | BL*  | Einheit |
|--------------------------------|---------------------|------|---------|
| maximale Wasserkapazität (WK)  | $\geq 20 - \leq 65$ | 30   | Vol.-%  |
| Luftgehalt bei max. WK         | $\geq 10$           | 25   | Vol.-%  |
| Gesamtporenvolumen             |                     | 55   | Vol.-%  |
| Wasserdurchlässigkeit mod. Kf  | 60 – 400            | 61,3 | mm/min  |
| pH-Wert                        | 6,0 – 8,5           | 7,15 |         |
| Salzgehalt                     | $\leq 3,5$          | 0,9  | g/l     |
| Gehalt an organischer Substanz | $\leq 40,0$         | 20   | g/l     |

\* FLL-Prüfzeugnis vom 29.08.2011

**Verlegehinweise** Substrat aufbringen und plan abziehen; Einbaugenauigkeit +/- 1,5 cm.  
Verdichtungsfaktor für Transport und Einbau 15 %

**Volumengewichte** trocken: ca. 880 - 930 kg/m<sup>3</sup>  
wassergesättigt: ca. 1180 – 1230 kg/m<sup>3</sup>

**Lieferform** Silo, Kipper
